# Supplementary material
Source: publisher figshare collection journal article supplement (https://sage.figshare.com/ndownloader/files/21922668)
Supplement: Supplementary file 1 [file 21922668]

Supplementary Material for:

**Double Letter Processing in Developmental and Skilled Handwriting Production: Evidence from Kinematics**

Stefan Hess, Petroula Mousikou, and Sascha Schroeder

*Materials*

| No Consonant Doubling  <CVCC>, or <CVCCV> |  | Consonant Doubling  <CV[CC]>, or <CV[CC]V> |
| --- | --- | --- |
| Hals |  | Wall |
| Samt |  | Lamm |
| Bart |  | Narr |
| Rast |  | Pass |
| Zelt |  | Fell |
| Nerz |  | Herr |
| Mist |  | Riss |
| Wolf |  | Zoll |
| Post |  | Boss |
| Lust |  | Muss |
| Falke |  | Falle |
| Kante |  | Kanne |
| Tante |  | Tanne |
| Karte |  | Karre |
| Maske |  | Masse |
| Taste |  | Tasse |
| Welpe |  | Welle |
| Rinde |  | Rinne |
| Wolke |  | Wolle |
| Sonde |  | Sonne |

*Note.* Consonant letter (C), and vowel letter (V).
